# Supplementary material for: Analysis of risk factors of mortality in rheumatoid arthritis patients with interstitial lung disease: a nationwide, population-based cohort study in Taiwan
Source: HighWire-hosted journal article supplement (doi:10.1136/rmdopen-2022-002343), 2022-08-01
Supplement: rmdopen-2022-002343supp001_data_supplement.pdf [file rmdopen-2022-002343supp001_data_supplement.pdf]

# Analysis of risk factors of Mortality in Rheumatoid Arthritis

## Patients with Interstitial Lung Disease: A Nationwide, Population-based, Cohort Study

Table A. Selected comorbidities and their corresponding ICD-9-CM codes.

| Comorbidities                    | ICD-9-CM                                            |
|----------------------------------|-----------------------------------------------------|
| Hypertension                     | 401–405                                             |
| Hyperlipidaemia                  | 272                                                 |
| Myocardial infarction            | 410,412                                             |
| Congestive heart failure         | 428                                                 |
| Peripheral vascular disease      | 441, 443.9, 785.4, V43.4                            |
| Cerebrovascular disease          | 430-438                                             |
| Dementia                         | 290                                                 |
| COPD                             | 490-505,506.4                                       |
| Connective tissue disease        | 710.0, 710.1, 710.4, 714.0, 714.1, 714.2,714.81,725 |
| Peptic ulcer disease             | 531-534                                             |
| Mild liver disease               | 571.2, 571.4-571.6                                  |
| Diabetes mellitus                | 250.0-250.3, 250.7                                  |
| DM with end-organ damage         | 250.4-250.6                                         |
| Hemiplegia                       | 342, 344.1                                          |
| Moderate to severe renal disease | 582, 583.0-583.7, 585, 586, 588                     |
| Tumor                            | 140-195, 200-208                                    |
| Metastatic solid tumor           | 196-199                                             |

Abbreviations: ICD-9-CM, International Classification of Diseases, Ninth Revision, Clinical Modification;

COPD, chronic obstructive pulmonary disease; DM, diabetes mellitus.

Table 1 Baseline characteristics in ILD group and non-ILD group

|                                                       | Before PSM (1:10 sex, age and disease duration-matched population) |                |             |       | 1:1 PSM population |                |             |           |
|-------------------------------------------------------|--------------------------------------------------------------------|----------------|-------------|-------|--------------------|----------------|-------------|-----------|
|                                                       | None ILD<br>n=1,640                                                | ILD<br>n=164   | P-<br>value | ASD   | None ILD<br>n=155  | ILD<br>n=155   | P-<br>value | AS<br>D   |
| <b>Gender</b>                                         |                                                                    |                | 1.000       | 0.000 |                    |                | 1.000       | 0.00<br>0 |
| Female                                                | 1,280 (78.0)                                                       | 128<br>(78.0)  |             |       | 123 (79.4)         | 123<br>(79.4)  |             |           |
| Male                                                  | 360 (22.0)                                                         | 36 (22.0)      |             |       | 32 (20.6)          | 32 (20.6)      |             |           |
| <b>Age at RA<br/>diagnosis, years<br/>(mean ± SD)</b> | 58.8 ± 11.6                                                        | 58.8 ±<br>11.7 | 1.000       | 0.000 | 59.3 ±<br>11.8     | 59.2 ±<br>11.5 | 0.950       | 0.00<br>7 |
| <b>Age at ILD<br/>diagnosis, years</b>                | 62.3±11.7                                                          | 62.3±11.8      | 1.000       | 0.000 | 62.7±12.1          | 62.7±11.<br>7  | 0.973       | 0.00<br>4 |
| <b>Disease duration,<br/>years (mean ± SD)</b>        | 3.5±2.8                                                            | 3.5±2.8        | 1.000       |       | 3.5±2.8            | 3.5±2.9        | 0.904       |           |
| <b>Urbanisation</b>                                   |                                                                    |                | 0.122       |       |                    |                | 0.269       |           |
| Urban                                                 | 447 (27.3)                                                         | 57 (34.8)      |             |       | 40 (25.8)          | 53 (34.2)      |             |           |
| Suburban                                              | 716 (43.7)                                                         | 63 (38.4)      |             |       | 69 (44.5)          | 60 (38.7)      |             |           |
| Rural                                                 | 477 (29.1)                                                         | 44 (26.8)      |             |       | 46 (29.7)          | 42 (27.1)      |             |           |
| <b>Low income</b>                                     | 843 (51.4)                                                         | 81 (49.4)      | 0.623       |       | 77 (49.7)          | 75 (48.4)      | 0.820       |           |
| <b>Comorbidities<sup>†</sup></b>                      |                                                                    |                |             |       |                    |                |             |           |
| Hypertension                                          | 515 (31.4)                                                         | 44 (26.8)      | 0.227       | 0.101 | 46 (29.7)          | 41 (26.5)      | 0.527       | 0.07<br>2 |
| Hyperlipidaemia                                       | 179 (10.9)                                                         | 14 (8.5)       | 0.348       | 0.080 | 13 (8.4)           | 12 (7.7)       | 0.835       | 0.02<br>4 |
| Myocardial<br>infarction                              | 6 (0.4)                                                            | 0 (0.0)        | 0.438       |       | 0 (0.0)            | 0 (0.0)        | NA          |           |
| Congestive heart<br>failure                           | 33 (2.0)                                                           | 12 (7.3)       | <0.00<br>1  | 0.254 | 9 (5.8)            | 9 (5.8)        | 1.000       | 0.00<br>0 |
| Peripheral vascular<br>disease                        | 14 (0.9)                                                           | 0 (0.0)        | 0.235       | NA    | 0 (0.0)            | 0 (0.0)        | NA          |           |

|                                       |              |            |        |       |            |            |       |       |
|---------------------------------------|--------------|------------|--------|-------|------------|------------|-------|-------|
| Cerebrovascular disease               | 67 (4.1)     | 8 (4.9)    | 0.628  | 0.038 | 5 (3.2)    | 6 (3.9)    | 0.759 | 0.035 |
| Dementia                              | 13 (0.8)     | 2 (1.2)    | 0.566  | 0.043 | 2 (1.3)    | 2 (1.3)    | 1.000 | 0.000 |
| COPD                                  | 133 (8.1)    | 42 (25.6)  | <0.001 | 0.481 | 36 (23.2)  | 36 (23.2)  | 1.000 | 0.000 |
| Connective tissue disease             | 1,313 (80.1) | 154 (93.9) | <0.001 | 0.420 | 147 (94.8) | 145 (93.5) | 0.627 | 0.055 |
| Peptic ulcer disease                  | 300 (18.3)   | 42 (25.6)  | 0.023  | 0.177 | 43 (27.7)  | 39 (25.2)  | 0.607 | 0.059 |
| Mild liver disease                    | 85 (5.2)     | 7 (4.3)    | 0.612  | 0.043 | 7 (4.5)    | 7 (4.5)    | 1.000 | 0.000 |
| Diabetes mellitus                     | 191 (11.6)   | 17 (10.4)  | 0.624  | 0.041 | 13 (8.4)   | 14 (9.0)   | 0.840 | 0.023 |
| DM with end-organ damage              | 43 (2.6)     | 1 (0.6)    | 0.111  | 0.160 | 2 (1.3)    | 1 (0.6)    | 0.562 | 0.066 |
| Hemiplegia                            | 6 (0.4)      | 1 (0.6)    | 0.632  | 0.035 | 1 (0.6)    | 0 (0.0)    | 0.317 | NA    |
| Moderate to severe renal disease      | 36 (2.2)     | 2 (1.2)    | 0.407  | 0.075 | 1 (0.6)    | 2 (1.3)    | 0.562 | 0.066 |
| Tumor                                 | 61 (3.7)     | 10 (6.1)   | 0.135  | 0.110 | 5 (3.2)    | 8 (5.2)    | 0.395 | 0.097 |
| Metastatic solid tumor                | 9 (0.5)      | 2 (1.2)    | 0.293  | 0.072 | 1 (0.6)    | 2 (1.3)    | 0.562 | 0.066 |
| <b>Use of medication at baseline†</b> |              |            |        |       |            |            |       |       |
| NSAID                                 | 1,530 (93.3) | 159 (97)   | 0.067  |       | 149 (96.1) | 150 (96.8) | 0.759 |       |
| Corticosteroid                        | 1,166 (71.1) | 146 (89.0) | <0.001 |       | 130 (83.9) | 138 (89.0) | 0.184 |       |
| Methotrexate                          | 771 (47)     | 114 (69.5) | <0.001 |       | 93 (60.0)  | 110 (71.0) | 0.042 |       |
| Sulfasalazine                         | 787 (48)     | 97 (59.1)  | 0.006  |       | 83 (53.5)  | 93 (60.0)  | 0.252 |       |
| Leflunomide                           | 154 (9.4)    | 36 (22.0)  | <0.001 |       | 15 (9.7)   | 36 (23.2)  | 0.001 |       |
| Hydroxychloroquine                    | 941 (57.4)   | 121 (73.8) | <0.001 |       | 111 (71.6) | 113 (72.9) | 0.800 |       |

|                    |          |           |        |          |           |       |
|--------------------|----------|-----------|--------|----------|-----------|-------|
| Immunosuppressants | 97 (5.9) | 23 (14.0) | <0.001 | 12 (7.7) | 22 (14.2) | 0.069 |
| TNFi               | 80 (4.9) | 17 (10.4) | 0.003  | 9 (5.8)  | 17 (11.0) | 0.101 |
| Rituximab          | 8 (0.5)  | 4 (2.4)   | 0.003  | 0 (0.0)  | 4 (2.6)   | 0.044 |
| Tocilizumab        | 0 (0.0)  | 1 (0.6)   | 0.002  | 0 (0.0)  | 1 (0.6)   | 0.317 |
| Abatacept          | 1 (0.1)  | 0 (0.0)   | 0.752  | 0 (0.0)  | 0 (0.0)   | NA    |

†Comorbidity and medications were identified within one year before index date.

Data are shown as number (%) unless specified otherwise.

Abbreviations: ILD, interstitial lung disease; PSM, propensity score matching; ASD, absolute standardised difference; RA, rheumatoid arthritis; SD, standard deviation; NA, not assessed; COPD, chronic obstructive pulmonary disease; DM, diabetes mellitus; NSAID, nonsteroidal anti-inflammatory drug; TNFi, tumor necrosis factor inhibitor.

Table 2. Demographics and clinical characteristics in rheumatoid arthritis patients with interstitial lung disease, n = 214

| Variable                                       | Number (%), unless specified otherwise |
|------------------------------------------------|----------------------------------------|
| <b>Gender</b>                                  |                                        |
| Female                                         | 138 (64.5)                             |
| Male                                           | 76 (35.5)                              |
| <b>Age at RA diagnosis, years (mean ± SD)</b>  | 60.6±14.2                              |
| <b>Age at ILD diagnosis, years (mean ± SD)</b> | 64.2±14.2                              |
| <b>Disease duration, years (mean ± SD)</b>     | 3.6±3.0                                |
| <b>Urban</b>                                   |                                        |
| Urban                                          | 77 (36.0)                              |
| Suburban                                       | 83 (38.8)                              |
| Rural                                          | 54 (25.2)                              |
| <b>Low income</b>                              | 117 (54.7)                             |
| <b>Comorbidities<sup>†</sup></b>               |                                        |
| Hypertension                                   | 63 (29.4)                              |
| Hyperlipidaemia                                | 20 (9.4)                               |
| Congestive heart failure                       | 17 (7.9)                               |
| Peripheral vascular disease                    | 1 (0.5)                                |
| Cerebrovascular disease                        | 10 (4.7)                               |
| Dementia                                       | 2 (0.9)                                |
| COPD                                           | 57 (26.6)                              |
| Connective tissue disease                      | 202 (94.4)                             |
| Peptic ulcer disease                           | 55 (25.7)                              |
| Mild liver disease                             | 9 (4.2)                                |
| Diabetes mellitus                              | 21 (9.8)                               |
| DM with end-organ damage                       | 1 (0.5)                                |
| Hemiplegia                                     | 1 (0.5)                                |
| Moderate to severe renal disease               | 5 (2.3)                                |
| Tumor                                          | 12 (5.6)                               |
| Metastatic solid tumor                         | 2 (0.9)                                |

**Use of medications at baseline<sup>†</sup>**

|                          |            |
|--------------------------|------------|
| NSAID                    | 208 (97.2) |
| Corticosteroid           | 192 (89.7) |
| Methotrexate             | 148 (69.2) |
| Sulfasalazine            | 119 (55.6) |
| Leflunomide              | 44 (20.6)  |
| Hydroxychloroquine       | 150 (70.1) |
| Cyclophosphamide         | 5 (2.3)    |
| Other immunosuppressant* | 26 (12.1)  |
| TNFi                     | 21 (9.8)   |
| Tocilizumab              | 1 (0.5)    |
| Abatacept                | 0 (0.0)    |
| Rituximab                | 5 (2.3)    |

**Time-averaged dose of medications, mean±SD**

|                                                          |              |
|----------------------------------------------------------|--------------|
| NSAID (cDDD/day)                                         | 0.8±0.6      |
| Corticosteroid (Pd equivalent dose, mg/day)              | 10.0±14.1    |
| Methotrexate (per 2.5 mg/week)                           | 1.5±1.8      |
| Sulfasalazine (cumulative dose/500mg)/day                | 0.8±1.1      |
| Leflunomide (cDDD/day)                                   | 0.1±0.2      |
| Hydroxychloroquine (cDDD/day)                            | 0.3±0.3      |
| Cyclophosphamide (cumulative dose, mg, /<br>500mg/month) | 0.1±0.3      |
| Other immunosuppressants* (cDDD/day)                     | 0.03±0.1     |
| TNFi (cDDD/day)                                          | 0.1±0.2      |
| Tocilizumab (cDDD/day)                                   | 0.001±0.01   |
| Abatacept (cDDD/day)                                     | 0.0004±0.005 |
| Rituximab (cumulative dose, mg, /500mg/6<br>months)      | 0.1±0.6      |

<sup>†</sup>Comorbidity and medications were identified within one year before index date.

Abbreviations: RA, rheumatoid arthritis; ILD, interstitial lung disease; COPD, chronic obstructive pulmonary disease; DM, diabetes mellitus; NSAID, nonsteroidal anti-inflammatory drug; SD, standard deviation; cDDD, cumulative defined daily dose; TNFi, tumor necrosis factor inhibitor.

\*Other immunosuppressants: cyclosporin, azathioprine, mycophenolate mofetil, mycophenolic acid.

Table 3. Cox proportional hazard regressions for estimation of adjusted HRs with 95% CIs in RA patients with ILD, n = 214

| Variable                         | Univariable            |         | Multivariable    |         |
|----------------------------------|------------------------|---------|------------------|---------|
|                                  | HR (95% CI)            | P value | HR (95% CI)      | P value |
| <b>Male (reference: female)</b>  | 2.69 (1.70–4.25)       | <0.001  | 0.90 (0.53–1.54) | 0.700   |
| <b>Age at ILD diagnosis</b>      | 1.04 (1.02–1.06)       | <0.001  | 1.05 (1.03–1.08) | <0.001  |
| <b>Disease duration, years</b>   | 1.01 (0.92–1.10)       | 0.869   |                  |         |
| <b>Urbanisation</b>              |                        |         |                  |         |
| Urban                            | Ref.                   |         |                  |         |
| Suburban                         | 1.36 (0.79–2.35)       | 0.273   |                  |         |
| Rural                            | 1.28 (0.70–2.33)       | 0.417   |                  |         |
| <b>Low income</b>                | 1.45 (0.90–2.33)       | 0.123   |                  |         |
| <b>Comorbidities<sup>†</sup></b> |                        |         |                  |         |
| Hypertension                     | 1.37 (0.85–2.20)       | 0.201   |                  |         |
| Hyperlipidaemia                  | 1.04 (0.45–2.41)       | 0.921   |                  |         |
| Congestive heart failure         | 1.70 (0.73–3.95)       | 0.218   |                  |         |
| Peripheral vascular disease      | 210.50 (13.17–3365.37) | <0.001  | Cannot estimate  |         |
| Cerebrovascular disease          | 1.75 (0.64–4.81)       | 0.281   |                  |         |
| Dementia                         | 1.88 (0.26–13.60)      | 0.530   |                  |         |
| COPD                             | 3.52 (2.22–5.59)       | <0.001  | 2.12 (1.25–3.58) | 0.005   |
| Connective tissue disease        | 1.03 (0.38–2.83)       | 0.950   |                  |         |
| Peptic ulcer disease             | 0.90 (0.53–1.53)       | 0.691   |                  |         |

|                                          |                     |       |                     |       |
|------------------------------------------|---------------------|-------|---------------------|-------|
| Mild liver disease                       | 0.77 (0.24–2.47)    | 0.662 |                     |       |
| Diabetes mellitus                        | 1.46 (0.75–2.85)    | 0.264 |                     |       |
| DM with end-organ damage                 | 15.41 (2.02–117.78) | 0.008 | 33.85 (3.72–308.24) | 0.002 |
| Hemiplegia                               | 4.33 (0.60–31.56)   | 0.148 |                     |       |
| Moderate to severe renal disease         | 0.55 (0.08–3.97)    | 0.555 |                     |       |
| Tumor                                    | 1.26 (0.46–3.47)    | 0.650 |                     |       |
| Metastatic solid tumor                   | 3.25 (0.45–23.78)   | 0.245 |                     |       |
| <b>Use of medications at baseline†</b>   |                     |       |                     |       |
| NSAID                                    | 0.87 (0.21–3.53)    | 0.840 |                     |       |
| Steroid                                  | 2.72 (0.86–8.65)    | 0.090 |                     |       |
| Methotrexate                             | 0.86 (0.53–1.40)    | 0.548 |                     |       |
| Sulfasalazine                            | 1.06 (0.66–1.68)    | 0.819 |                     |       |
| Leflunomide                              | 0.99 (0.55–1.76)    | 0.958 |                     |       |
| Hydroxychloroquine                       | 0.90 (0.54–1.49)    | 0.668 |                     |       |
| Cyclophosphamide                         | 0.27 (0.04–1.93)    | 0.190 |                     |       |
| Other immunosuppressant*                 | 0.92 (0.46–1.85)    | 0.820 |                     |       |
| TNFi                                     | 0.12 (0.02–0.88)    | 0.037 | 0.42 (0.06–3.15)    | 0.395 |
| Rituximab                                | 1.99 (0.49–8.17)    | 0.339 |                     |       |
| <b>Time-averaged dose of medications</b> |                     |       |                     |       |
| NSAID (cDDD/day)                         | 1.11 (0.70–1.75)    | 0.657 |                     |       |



|                                                      |                   |        |                  |        |
|------------------------------------------------------|-------------------|--------|------------------|--------|
| Corticosteroid (Pd equivalent dose, mg/day)          | 1.07 (1.05–1.08)  | <0.001 | 1.09 (1.07–1.11) | <0.001 |
| Methotrexate (per 2.5 mg/week)                       | 0.77 (0.65–0.91)  | 0.002  | 0.94 (0.77–1.13) | 0.504  |
| Sulfasalazine (cdose/500mg/day)                      | 1.10 (0.90–1.34)  | 0.371  |                  |        |
| Leflunomide (cDDD/day)                               | 0.39 (0.10–1.48)  | 0.166  |                  |        |
| Hydroxychloroquine (cDDD/day)                        | 2.55 (0.99–6.60)  | 0.053  |                  |        |
| Cyclophosphamide (cumulative dose, mg, /500mg/month) | 2.02 (1.21–3.37)  | 0.007  | 1.41 (0.86–2.30) | 0.177  |
| Other immunosuppressants* (cDDD/day)                 | 5.62 (0.83–38.14) | 0.077  |                  |        |
| TNFi (cDDD/day)                                      | 0.07 (0.01–0.77)  | 0.030  | 0.18 (0.01–2.41) | 0.195  |
| Rituximab (cumulative dose, mg, /500mg/6 months)     | 0.28 (0.04–2.00)  | 0.204  | 0.53 (0.09–3.23) | 0.493  |

†Comorbidity and medical utilisation identified within 1 year before index date.

Abbreviations: RA, rheumatoid arthritis; ILD, interstitial lung disease; COPD, chronic obstructive pulmonary disease; DM, diabetes mellitus; NSAID, nonsteroidal anti-inflammatory drug; cumulative defined daily dose; TNFi, tumor necrosis factor inhibitor.

\*Other immunosuppressants: cyclosporin, azathioprine, mycophenolate mofetil, mycophenolic acid
